# Supplementary material
Source: MDPI journal article supplement (https://www.mdpi.com/2075-4701/12/5/879)
Supplement: s1 [file s1]

# Influence of Th, Zr, and Ti Dopants on solution property of Xe in Uranium Dioxide with Defects: A DFT + U Study

Liu Pan,<sup>1</sup> Zhen Wang,<sup>2,\*</sup> Qingqing Wang,<sup>2</sup> Zhixiao Liu,<sup>3,\*</sup> Min Pan,<sup>4</sup> Zheng Huang<sup>1,\*</sup> and Lu Wu<sup>2</sup>

<sup>1</sup> School of Physical Science Technology, Southwest Jiaotong University, Chengdu, Sichuan 610031, China

<sup>2</sup> The First Sub-institute, Nuclear Power Institute of China, Chengdu, Sichuan 610041, China

<sup>3</sup> College of Materials Science and Engineering, Hunan University, Changsha, Hunan 410082, China

<sup>4</sup> Superconductivity and New Energy R&D Center, Key Laboratory of Advanced Technology of Materials (Ministry of Education), Southwest Jiaotong University, Chengdu, China

\*Correspondence: Authors: zhhuang@swjtu.edu.cn (Z. Huang); wangzshu@126.com (Z. Wang);

zxliu@hnu.edu.cn (Z. L)

## Determination of $U_{\text{eff}}$ of Th, Zr, and Ti impurity atoms

Th, Zr, and Ti atoms contain d-orbital electrons, which have a strong correlation effect. The traditional LDA or GGA cannot describe the strong correlation effect well, so the DFT + U method is used for calculation. Impurity atoms occupy the position of U atoms in crystalline  $\text{UO}_2$  and combine with the surrounding oxygen atoms to form +4 valence ions. To better describe the influence of impurity atoms on the dissolution and nucleation behavior of Xe atoms in  $\text{UO}_2$ , we evaluated the ground state properties of  $\text{ThO}_2$ ,  $\text{ZrO}_2$ , and  $\text{TiO}_2$  under different  $U_{\text{eff}}$ , compared the calculated lattice constants, band gaps, and elastic constants with the experimental values, and finally determined the most suitable  $U_{\text{eff}}$  value of impurity atoms.

The band gap of  $\text{ThO}_2$  can be increased using the DFT + U method. When the  $U_{\text{eff}}$  value is larger than 7.0 eV, the calculated band gap can be close to the experimental value of 5.9 eV[1], but at this time, the lattice is seriously distorted, as shown in Table S1. Shields et al. [2] studied Th and believed that adding the  $U_{\text{eff}}$  parameter would not increase structural accuracy. Therefore, for Th, we used  $U_{\text{eff}} = 0$  eV for calculation. Table S1 shows the ground state properties of  $\text{ThO}_2$ . It can be seen that the calculated results are in good agreement with the experimental values except for the band gap.

For  $\text{ZrO}_2$ , we found that the band gap of  $\text{ZrO}_2$  can reach the experimental value of 5.25 eV only when the  $U_{\text{eff}}$  value is 9.5 eV, but the lattice distortion is serious, as shown in Table S2. Delamelina et al. [3] found that the values of  $U_{\text{eff}}$  larger than 4 eV should be avoided in these calculations due to the deterioration observed in the description of the structural parameter, relative energies, and dielectric constants. When  $U_{\text{eff}} = 4$  eV, although there is a certain deviation between the lattice parameters and the experimental values, the deviations of elastic constant, dielectric constant, and energy band gap from the experimental values are significantly reduced, and the calculated phonon dispersion curve is also improved considerably. Therefore, when  $U_{\text{eff}} = 4.0$  eV, the properties of  $\text{ZrO}_2$  can be better described.

In  $\text{TiO}_2$ , due to the existence of the 3d electron orbital of the Ti atom, it is necessary to use DFT + U method. The calculation results show that the band gap can only reach the experimental value of 3.2 eV when  $U_{\text{eff}} = 8.5$  eV, as shown in Table S3. Stausholm et al. [4] believe that since  $\text{TiO}_2$  is more of a charge-transfer type semiconductor than a Mott–Hubbard insulator, we do not expect to be able to open up the band gap to its experimental value using any reasonable value of  $U_{\text{eff}}$ . Combined with the literature research [5–8], we finally determined  $U_{\text{eff}} = 4.0$  eV, which is enough to describe the properties of  $\text{TiO}_2$  well. In Table S3, the lattice constant and bulk modulus of  $\text{TiO}_2$  calculated theoretically have only about a 2% error with the experimental value, which shows that the calculation method in this paper is reasonable.

**Table S1.** Ground state properties of ThO<sub>2</sub> under different  $U_{\text{eff}}$  values. Lattice parameter (a, b, c), band gap ( $E_{\text{gap}}$ ), bulk modulus (B), shear modulus (G), Young's modulus (E), and elastic constant ( $C_{11}$ ,  $C_{12}$ ,  $C_{44}$ ), compared to the reported experimental values (Exp.).

| Lattice constant      |                       |                       |                       |                       |                       |                       |         |         |
|-----------------------|-----------------------|-----------------------|-----------------------|-----------------------|-----------------------|-----------------------|---------|---------|
| U <sub>eff</sub> (eV) | E <sub>gap</sub> (eV) | (Å)                   | C <sub>11</sub> (GPa) | C <sub>12</sub> (GPa) | C <sub>44</sub> (GPa) | B (GPa)               | G (GPa) | E (GPa) |
| a=b=c                 |                       |                       |                       |                       |                       |                       |         |         |
| 0.0                   | 4.464                 | 5.617                 | 355.6                 | 106.3                 | 71.7                  | 189.4                 | 89.6    | 232.3   |
| 1.0                   | 4.552                 | 5.632                 | 353.1                 | 106.4                 | 74.4                  | 188.6                 | 91.2    | 235.7   |
| 2.0                   | 4.626                 | 5.646                 | 349.0                 | 103.4                 | 74.8                  | 185.3                 | 91.3    | 235.3   |
| 2.5                   | 4.764                 | 5.652                 | 352.6                 | 107.9                 | 75.3                  | 189.5                 | 91.5    | 236.5   |
| 3.0                   | 4.683                 | 5.658                 | 357.4                 | 113.8                 | 74.8                  | 195.0                 | 91.0    | 236.3   |
| 3.5                   | 4.820                 | 5.664                 | 351.5                 | 108.1                 | 74.7                  | 189.2                 | 91.0    | 235.2   |
| 4.0                   | 4.725                 | 5.672                 | 352.2                 | 109.3                 | 74.6                  | 190.3                 | 90.7    | 234.9   |
| 4.5                   | 4.741                 | 5.678                 | 357.2                 | 116.1                 | 75.2                  | 196.4                 | 91.0    | 236.4   |
| 5.0                   | 4.753                 | 5.684                 | 350.1                 | 111.5                 | 75.8                  | 191.1                 | 91.0    | 235.5   |
| 5.5                   | 4.878                 | 5.690                 | 347.9                 | 110.2                 | 75.8                  | 189.4                 | 90.8    | 234.9   |
| 6.0                   | 4.770                 | 5.696                 | 347.4                 | 110.7                 | 76.0                  | 189.6                 | 90.8    | 235.0   |
| 6.5                   | 4.873                 | 5.701                 | 334.6                 | 98.8                  | 75.7                  | 177.4                 | 90.5    | 232.0   |
| 7.0                   | 4.782                 | 5.707                 | 340.8                 | 107.2                 | 75.0                  | 185.1                 | 89.6    | 231.5   |
| 7.5                   | 4.831                 | 5.712                 | 339.4                 | 106.8                 | 75.7                  | 184.3                 | 90.0    | 232.2   |
| Exp.                  | 5-6[1,9]              | 5.600[10]<br>5.598[9] | 367[11]               | 106[11]               | 79[11]                | 198±2[10]<br>195±2[9] | 97[11]  | 249[11] |

**Table S2.** Ground state properties of ZrO<sub>2</sub> under different  $U_{\text{eff}}$  values. Lattice parameter (a, b, c), band gap ( $E_{\text{gap}}$ ), bulk modulus (B), shear modulus (G), Young's modulus (E), and elastic constant ( $C_{11}$ ,  $C_{12}$ ,  $C_{33}$ ,  $C_{44}$ ,  $C_{66}$ ), compared to the reported experimental values (Exp.).

| U <sup>eff</sup><br>(eV) | E <sub>gap</sub><br>(eV) | Lattice constant<br>(Å) |        |        | C <sub>11</sub><br>(GPa) | C <sub>12</sub><br>(GPa) | C <sub>33</sub><br>(GPa) | C <sub>44</sub><br>(GPa) | C <sub>66</sub><br>(GPa) | B<br>(GPa) | G<br>(GPa) | E<br>(GPa) |
|--------------------------|--------------------------|-------------------------|--------|--------|--------------------------|--------------------------|--------------------------|--------------------------|--------------------------|------------|------------|------------|
|                          |                          | a                       | b      | c      |                          |                          |                          |                          |                          |            |            |            |
|                          |                          |                         |        |        |                          |                          |                          |                          |                          |            |            |            |
| 1.0                      | 3.708                    | 5.209                   | 5.263  | 5.383  | 312.8                    | 157.6                    | 271.2                    | 80.3                     | 119.8                    | 190.0      | 89.6       | 232.2      |
| 2.0                      | 3.812                    | 5.231                   | 5.274  | 5.396  | 313.9                    | 158.7                    | 276.1                    | 84.2                     | 119.1                    | 192.4      | 90.5       | 234.7      |
| 2.5                      | 3.868                    | 5.241                   | 5.281  | 5.403  | 313.6                    | 159.1                    | 276.8                    | 85.8                     | 119.6                    | 192.6      | 90.8       | 235.4      |
| 3.0                      | 3.923                    | 5.252                   | 5.286  | 5.410  | 315.3                    | 158.3                    | 284.2                    | 87.4                     | 119.5                    | 194.7      | 91.8       | 238.1      |
| 3.5                      | 3.981                    | 5.264                   | 5.292  | 5.418  | 316.6                    | 158.0                    | 282.0                    | 88.7                     | 119.3                    | 195.0      | 91.8       | 238.1      |
| 4.0                      | 4.039                    | 5.274                   | 5.298  | 5.425  | 314.7                    | 158.5                    | 283.4                    | 89.9                     | 119.1                    | 194.8      | 92.0       | 238.4      |
| 4.5                      | 4.172                    | 5.285                   | 5.303  | 5.433  | 315.8                    | 159.2                    | 281.4                    | 90.6                     | 119.2                    | 194.8      | 91.8       | 237.9      |
| 5.0                      | 4.164                    | 5.300                   | 5.303  | 5.449  | 316.4                    | 163.8                    | 275.4                    | 90.7                     | 117.5                    | 194.7      | 87.2       | 227.5      |
| 5.5                      | 4.222                    | 5.310                   | 5.310  | 5.455  | 316.4                    | 162.2                    | 277.2                    | 91.5                     | 117.6                    | 194.5      | 88.1       | 229.7      |
| 6.0                      | 4.284                    | 5.320                   | 5.314  | 5.464  | 319.8                    | 160.1                    | 290.6                    | 92.4                     | 117.8                    | 197.2      | 89.7       | 233.6      |
| 6.5                      | 4.346                    | 5.332                   | 5.318  | 5.474  | 323.0                    | 155.9                    | 303.1                    | 93.3                     | 116.9                    | 198.7      | 91.5       | 238.0      |
| 7.0                      | 4.408                    | 5.341                   | 5.323  | 5.481  | 323.4                    | 154.0                    | 308.4                    | 94.1                     | 116.5                    | 198.8      | 92.8       | 241.0      |
| 7.5                      | 4.468                    | 5.352                   | 5.329  | 5.489  | 323.5                    | 153.3                    | 305.2                    | 94.7                     | 116.1                    | 198.0      | 92.3       | 239.6      |
| 8.5                      | 4.592                    | 5.372                   | 5.338  | 5.506  | 326.3                    | 148.3                    | 311.4                    | 95.5                     | 115.6                    | 197.0      | 92.5       | 239.9      |
| 9.5                      | 4.712                    | 5.391                   | 5.349  | 5.521  | 325.9                    | 145.9                    | 313.4                    | 96.8                     | 114.9                    | 195.9      | 93.9       | 243.0      |
| Exp.                     | 5.25                     | 5.151[                  | 5.212[ | 5.317[ | 361[13]                  | 142[13]                  | 258[13]                  | 99.9[13]                 | 126[13]                  | 187[13]    | 94[13]     | 241[13]    |
|                          | [12]                     | 12]                     | 12]    | 12]    | 358[14]                  | 144[14]                  | 240[14]                  | 99.1[14]                 | 130[14]                  | 177.5[14]  | 98.1[14]   | 248.6[14]  |

**Table S3.** Ground state properties of TiO<sub>2</sub> under different  $U_{\text{eff}}$  values. Lattice parameter (a, b, c), band gap ( $E_{\text{gap}}$ ), bulk modulus (B), shear modulus (G), Young's modulus  $\epsilon$ , and elastic constant ( $C_{11}$ ,  $C_{12}$ ,  $C_{13}$ ,  $C_{33}$ ,  $C_{44}$ ,  $C_{66}$ ), compared to the reported experimental values (Exp.).

| U <sub>eff</sub><br>(eV) | E <sub>gap</sub><br>(eV) | Lattice constant |       | C <sub>11</sub><br>(GPa) | C <sub>12</sub><br>(GPa) | C <sub>13</sub><br>(GPa) | C <sub>33</sub><br>(GPa) | C <sub>44</sub><br>(GPa) | C <sub>66</sub><br>(GPa) | B<br>(GPa) | G<br>(GPa) | E<br>(GPa) |
|--------------------------|--------------------------|------------------|-------|--------------------------|--------------------------|--------------------------|--------------------------|--------------------------|--------------------------|------------|------------|------------|
|                          |                          | (Å)              |       |                          |                          |                          |                          |                          |                          |            |            |            |
|                          |                          | a=b              | c     |                          |                          |                          |                          |                          |                          |            |            |            |
| 2.0                      | 2.364                    | 3.831            | 9.714 | 346.4                    | 129.7                    | 137.9                    | 210.6                    | 25.3                     | 59.5                     | 185.2      | 47.8       | 132.1      |
